# Supplementary material for: Allogeneic stem cell transplant recipients admitted to the intensive care unit during the peri-transplant period have unfavorable outcomes—results of a retrospective analysis from a German university hospital
Source: Springer Nature journal article supplement (doi:10.1007/s00277-021-04698-3), 2021-10-20

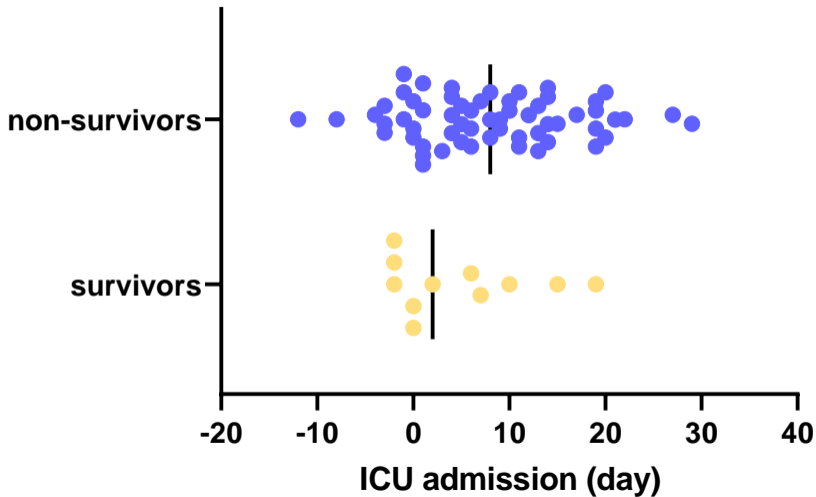

Supplement: MOESM2 [file 19776754]
